# Supplementary material for: A new fluorescent probe for Zn2+with red emission and its application in bioimaging
Source: Royal Society of Chemistry journal article supplement (doi:10.1039/c4dt00167b), 2014-01-01
Supplement: c4dt00167b1.pdf [file c4dt00167b1.pdf]

## Supporting information

### **A New Fluorescent Probe for Zn<sup>2+</sup> with Red Emission and Its Application in Bioimaging**

Yiqun Tan, Min Liu, Junkuo Gao, Jiancan Yu, Yuanjing Cui, Yu Yang\*, Guodong Qian\*

*State Key Laboratory of Silicon Materials, Cyrus Tang Center for Sensor Materials and Applications, Department of Materials Science & Engineering, Zhejiang University, Hangzhou, Zhejiang 310027 (P. R. China).*

Corresponding Authors:

gdqian@zju.edu.cn (G. Qian), yuyang@zju.edu.cn (Y. Yang)

## 1. Characterization data

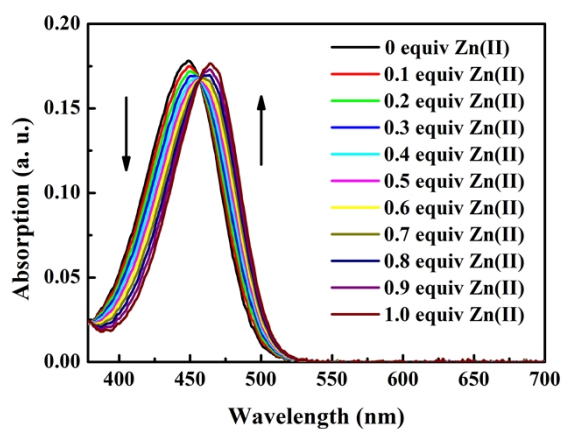

**Figure S1.** Absorption spectra of ZC-F4 (1 μM) upon titration of Zn<sup>2+</sup> at the concentration of 0, 0.1, 0.2, 0.3, 0.4, 0.5, 0.6, 0.7, 0.8, 0.9, 1.0 equiv.

## 2. Job's plot analysis

Job's plot analysis is carried on to determine the stoichiometry of ZC-F4 with Zn<sup>2+</sup>, during which the summation of [Zn<sup>2+</sup>] and [ZC-F4] is kept as 0.15 μM. The results suggest that Zn<sup>2+</sup> complex with ZC-F4 in 1:1 form.

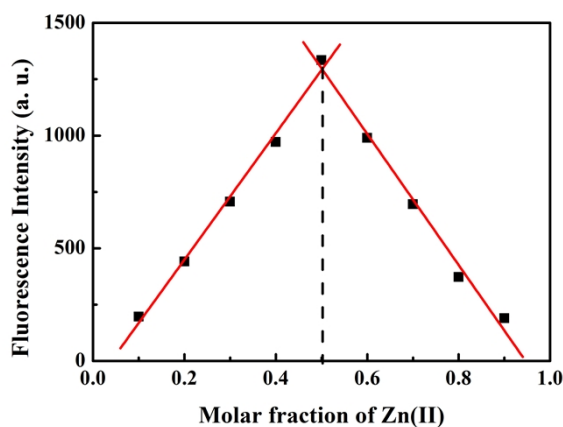

**Figure S2.** Job plot Analysis of the stoichiometry of ZC-F4 and Zn<sup>2+</sup> (excited at 368 nm and monitored at 609 nm)

## 3. Calculation of pKa

The pK<sub>a</sub> of ZC-F4 was calculated by using the Henderson-Hasselbalch equation:

$$-\log \frac{F_{\max} - F}{F - F_{\min}} = \text{pH} - \text{p}K_a \quad (1)$$

where  $F_{\max}$  and  $F_{\min}$  are the corresponding maximum and minimum fluorescence intensity,  $F$  is the fluorescence intensity observed at a fixed wavelength. The pK<sub>a</sub> of 26.11 for ZC-F4-Zn indicates ZC-F4 can form a stable complex with Zn<sup>2+</sup>.

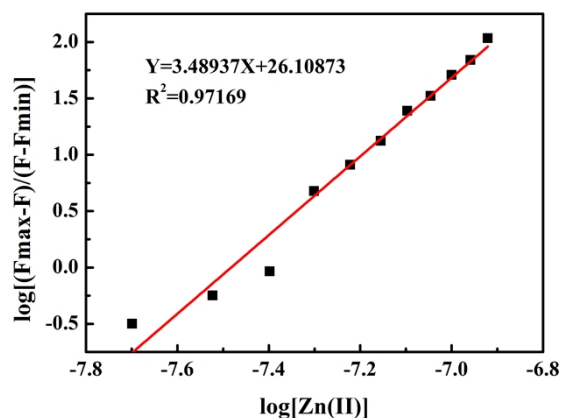

**Figure S3.** Analysis of fluorescence intensity changes as a function of [Zn<sup>2+</sup>] by using Henderson–Hasselbalch equation.
